# Supplementary material for: Mn-based catalysts supported on γ-Al2O3, TiO2 and MCM-41: a comparison for low-temperature NO oxidation with low ratio of O3/NO
Source: Royal Society of Chemistry journal article supplement (doi:10.1039/d1ra01820e), 2021-01-01
Supplement: d1ra01820e1.pdf [file d1ra01820e1.pdf]

## Supporting Information

### Mn-based catalysts supported on $\gamma$ -Al<sub>2</sub>O<sub>3</sub>, TiO<sub>2</sub> and MCM-41: a comparison for low-temperature NO oxidation with low ratio of O<sub>3</sub>/NO

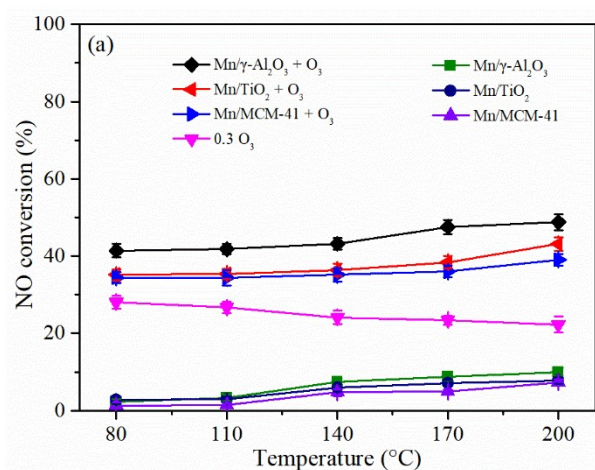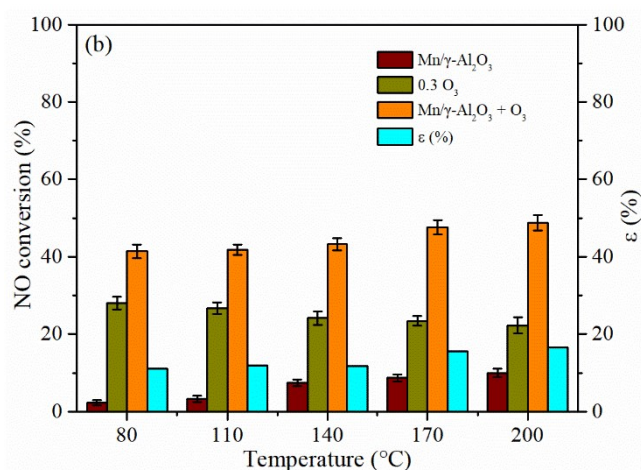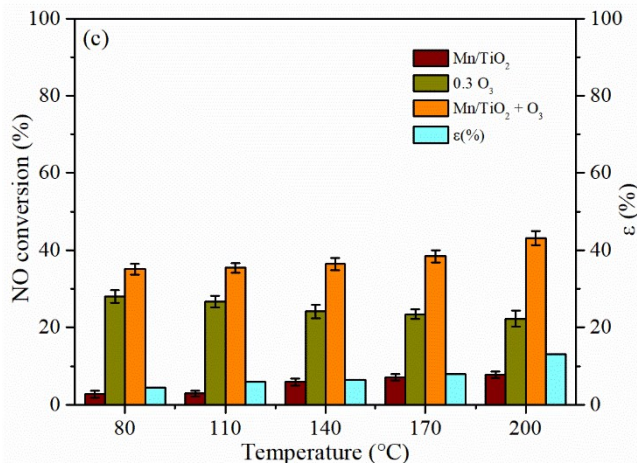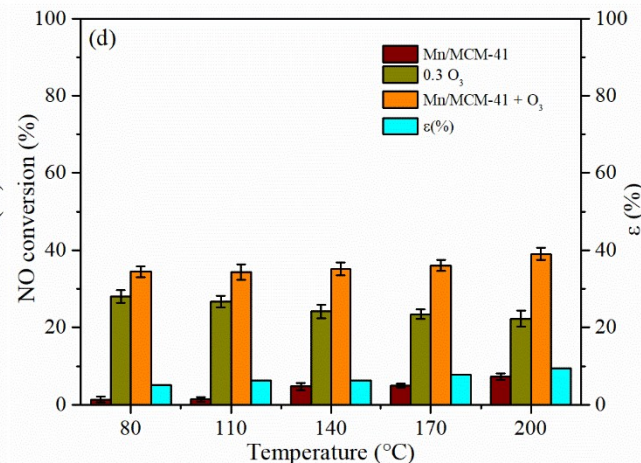

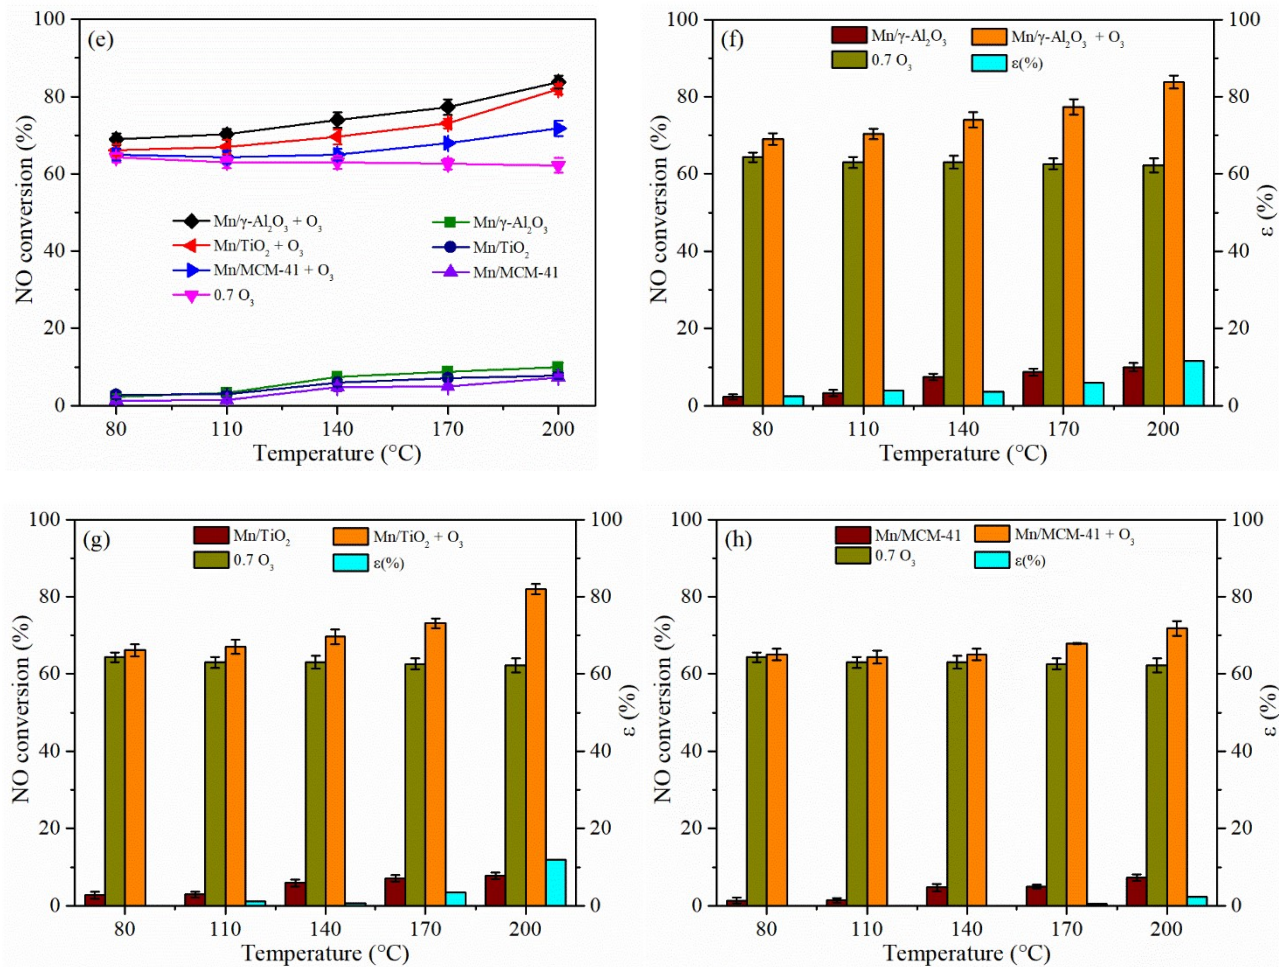

**Figs. 1.** NO conversion over 0.3 O<sub>3</sub> (the molar ratio of O<sub>3</sub>/NO = 0.3), Mn/γ-Al<sub>2</sub>O<sub>3</sub>, Mn/TiO<sub>2</sub>, and Mn/MCM-41 catalysts and the catalyst-O<sub>3</sub> combination (a); Synergistic effect of Mn/γ-Al<sub>2</sub>O<sub>3</sub> and 0.3 O<sub>3</sub> (b); Synergistic effect of Mn/TiO<sub>2</sub> and 0.3 O<sub>3</sub> (c); Synergistic effect of Mn/MCM-41 and 0.3 O<sub>3</sub> (d). NO conversion over 0.7 O<sub>3</sub> (the molar ratio of O<sub>3</sub>/NO = 0.7), Mn/γ-Al<sub>2</sub>O<sub>3</sub>, Mn/TiO<sub>2</sub>, and Mn/MCM-41 catalysts and the catalyst-O<sub>3</sub> combination (e); Synergistic effect of Mn/γ-Al<sub>2</sub>O<sub>3</sub> and 0.7 O<sub>3</sub> (f); Synergistic effect of Mn/TiO<sub>2</sub> and 0.7 O<sub>3</sub> (g); Synergistic effect of Mn/MCM-41 and 0.7 O<sub>3</sub> (h). Other reaction conditions were as follows: NO = 500 ppm, O<sub>2</sub> = 5 vol.%, GHSV = 24,000 h<sup>-1</sup>, T = 140 °C.

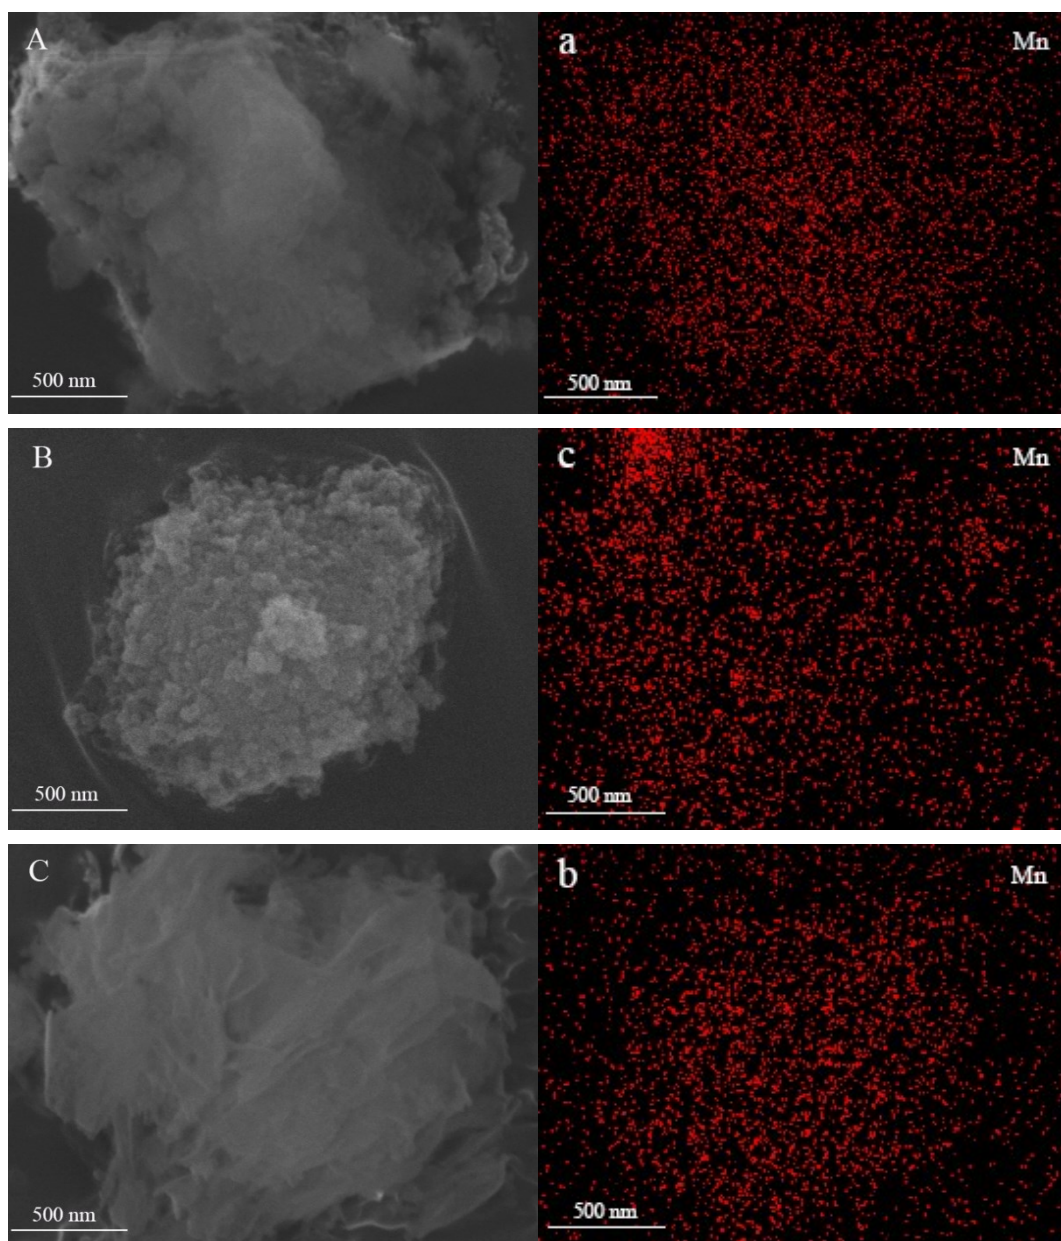

**Figs. 2.** EDS mappings of Mn/ $\gamma$ -Al<sub>2</sub>O<sub>3</sub> (a), Mn/TiO<sub>2</sub> (b), and Mn/MCM-41 (c)

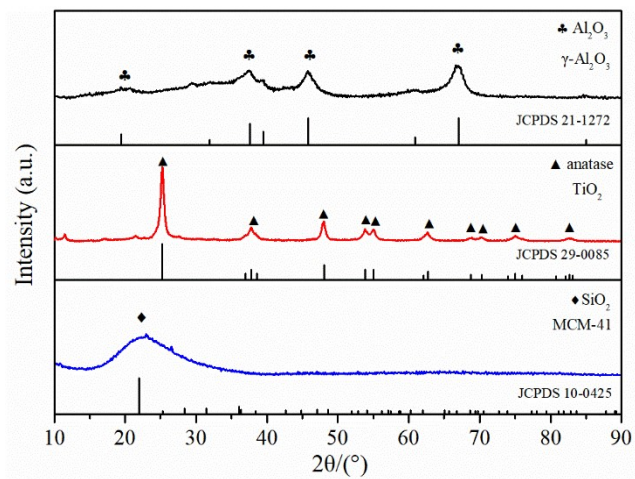

**Figs. 3.** XRD profiles of  $\gamma$ -Al<sub>2</sub>O<sub>3</sub>, TiO<sub>2</sub> and MCM-41

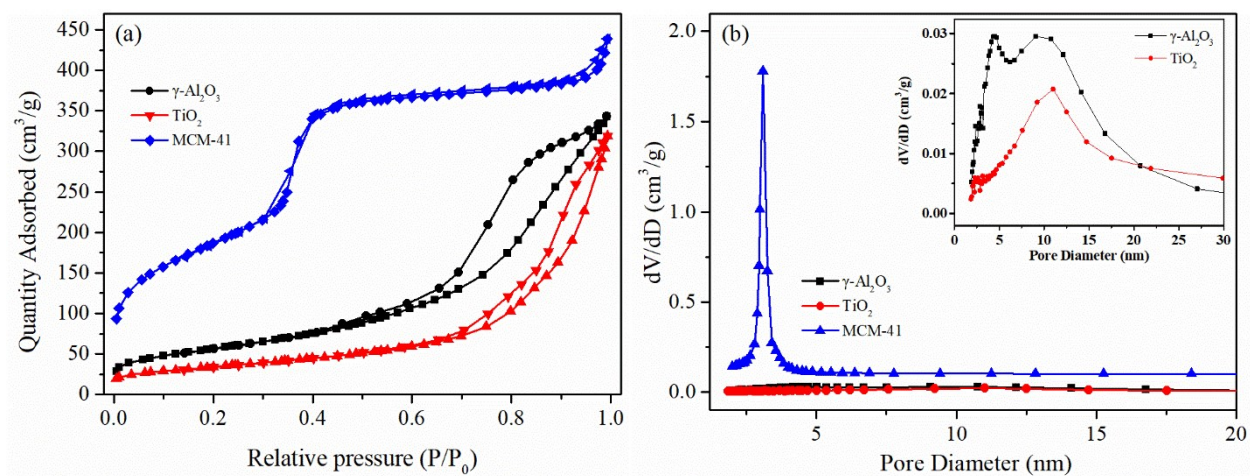

**Figs. 4.** N<sub>2</sub> adsorption-desorption isotherms and pore size distribution curves of  $\gamma$ -Al<sub>2</sub>O<sub>3</sub>, TiO<sub>2</sub> and MCM-41.
